# Supplementary material
Source: PubMed Central journal article supplement (PMC11568927)

## **Supplementary Materials**

We had problems with model convergence when simultaneously including all groups for several variables, likely as a result of redundant information (e.g., once we determine the proportion of the sample who identify as White American and Black American are known, then the proportion of the sample who identified our third racial group “other” is fully known and does not need to be estimated). For this reason, reported values for participants in the “other” group for race and clinical course and for the proportion of participants who never used tobacco regularly were not directly estimated from data, but rather were inferred as the remainder of the sample that did not endorse the other mutually exclusive categories. For summary statistics, percentages reflect the proportion of participants who endorsed an item relative to the total number of participants who contributed data to that measure.

Supplementary Table S1. Model Fit Indices from Sequential Runs of Latent Profile Analysis

| Number of<br>Classes | BIC    | Percent Decrease<br>in BIC from Prior<br>Class | VLMR<br><i>p</i> -value | Entropy |
|----------------------|--------|------------------------------------------------|-------------------------|---------|
| 1                    | 244028 |                                                |                         |         |
| 2                    | 222112 | 8.98                                           | <0.0001                 | 0.89    |
| 3                    | 217499 | 2.08                                           | <0.0001                 | 0.84    |
| 4                    | 215281 | 1.02                                           | <0.0001                 | 0.87    |
| 5                    | 213790 | 0.69                                           | <0.0001                 | 0.84    |
| 6                    | 212531 | 0.59                                           | <0.0001                 | 0.85    |
| 7                    | 211918 | 0.29                                           | 0.0004                  | 0.85    |
| 8                    | 211250 | 0.32                                           | 0.0042                  | 0.86    |
| 9                    | 210715 | 0.25                                           | 0.0014                  | 0.84    |
| 10                   | 210335 | 0.18                                           | 0.0560                  | 0.84    |
| 11                   | 209963 | 0.18                                           | 0.4641                  | 0.84    |
| 12                   | 209637 | 0.16                                           | 0.1242                  | 0.85    |

Supplementary Table S2. Hypothesis Tests Comparing Mobility PRO Responses Across Clusters

| Cluster Test Comparison |           | P-Value   |
|-------------------------|-----------|-----------|
| Cluster 1               | Cluster 2 | <0.00001* |
| Cluster 1               | Cluster 3 | <0.00001* |
| Cluster 1               | Cluster 4 | <0.00001* |
| Cluster 1               | Cluster 5 | <0.00001* |
| Cluster 1               | Cluster 6 | <0.00001* |
| Cluster 1               | Cluster 7 | <0.00001* |
| Cluster 1               | Cluster 8 | <0.00001* |
| Cluster 1               | Cluster 9 | <0.00001* |
| Cluster 2               | Cluster 3 | <0.00001* |
| Cluster 2               | Cluster 4 | <0.00001* |
| Cluster 2               | Cluster 5 | <0.00001* |
| Cluster 2               | Cluster 6 | <0.00001* |
| Cluster 2               | Cluster 7 | <0.00001* |
| Cluster 2               | Cluster 8 | <0.00001* |
| Cluster 2               | Cluster 9 | <0.00001* |
| Cluster 3               | Cluster 4 | <0.00001* |
| Cluster 3               | Cluster 5 | <0.00001* |
| Cluster 3               | Cluster 6 | <0.00001* |
| Cluster 3               | Cluster 7 | <0.00001* |
| Cluster 3               | Cluster 8 | <0.00001* |
| Cluster 3               | Cluster 9 | <0.00001* |
| Cluster 4               | Cluster 5 | <0.00001* |
| Cluster 4               | Cluster 6 | <0.00001* |
| Cluster 4               | Cluster 7 | <0.00001* |
| Cluster 4               | Cluster 8 | <0.00001* |
| Cluster 4               | Cluster 9 | <0.00001* |
| Cluster 5               | Cluster 6 | <0.00001* |
| Cluster 5               | Cluster 7 | <0.00001* |
| Cluster 5               | Cluster 8 | <0.00001* |
| Cluster 5               | Cluster 9 | <0.00001* |
| Cluster 6               | Cluster 7 | 0.00219*  |
| Cluster 6               | Cluster 8 | <0.00001* |
| Cluster 6               | Cluster 9 | <0.00001* |
| Cluster 7               | Cluster 8 | 0.01585*  |
| Cluster 7               | Cluster 9 | 0.00533*  |
| Cluster 8               | Cluster 9 | 0.68190   |

\*Reflects significance after adjusting for the false discovery rate at the  $p < .05$  level

Supplementary Table S3. Hypothesis Tests Comparing Hand Function PRO Responses Across Clusters

| Cluster Test Comparison |           | P-Value   |
|-------------------------|-----------|-----------|
| Cluster 1               | Cluster 2 | <0.00001* |
| Cluster 1               | Cluster 3 | 0.00179*  |
| Cluster 1               | Cluster 4 | <0.00001* |
| Cluster 1               | Cluster 5 | <0.00001* |
| Cluster 1               | Cluster 6 | <0.00001* |
| Cluster 1               | Cluster 7 | 0.71330   |
| Cluster 1               | Cluster 8 | <0.00001* |
| Cluster 1               | Cluster 9 | <0.00001* |
| Cluster 2               | Cluster 3 | <0.00001* |
| Cluster 2               | Cluster 4 | <0.00001* |
| Cluster 2               | Cluster 5 | <0.00001* |
| Cluster 2               | Cluster 6 | <0.00001* |
| Cluster 2               | Cluster 7 | <0.00001* |
| Cluster 2               | Cluster 8 | 0.25276   |
| Cluster 2               | Cluster 9 | <0.00001* |
| Cluster 3               | Cluster 4 | <0.00001* |
| Cluster 3               | Cluster 5 | <0.00001* |
| Cluster 3               | Cluster 6 | <0.00001* |
| Cluster 3               | Cluster 7 | 0.03114*  |
| Cluster 3               | Cluster 8 | 0.00103*  |
| Cluster 3               | Cluster 9 | <0.00001* |
| Cluster 4               | Cluster 5 | 0.00003*  |
| Cluster 4               | Cluster 6 | <0.00001* |
| Cluster 4               | Cluster 7 | <0.00001* |
| Cluster 4               | Cluster 8 | <0.00001* |
| Cluster 4               | Cluster 9 | 0.77461   |
| Cluster 5               | Cluster 6 | <0.00001* |
| Cluster 5               | Cluster 7 | <0.00001* |
| Cluster 5               | Cluster 8 | <0.00001* |
| Cluster 5               | Cluster 9 | 0.00579*  |
| Cluster 6               | Cluster 7 | <0.00001* |
| Cluster 6               | Cluster 8 | <0.00001* |
| Cluster 6               | Cluster 9 | <0.00001* |
| Cluster 7               | Cluster 8 | <0.00001* |
| Cluster 7               | Cluster 9 | <0.00001* |
| Cluster 8               | Cluster 9 | <0.00001* |

\*Reflects significance after adjusting for the false discovery rate at the  $p < .05$  level

Supplementary Table S4. Hypothesis Tests Comparing Tremor PRO Responses Across Clusters

| Cluster Test Comparison |           | P-Value   |
|-------------------------|-----------|-----------|
| Cluster 1               | Cluster 2 | <0.00001* |
| Cluster 1               | Cluster 3 | <0.00001* |
| Cluster 1               | Cluster 4 | <0.00001* |
| Cluster 1               | Cluster 5 | <0.00001* |
| Cluster 1               | Cluster 6 | <0.00001* |
| Cluster 1               | Cluster 7 | <0.00001* |
| Cluster 1               | Cluster 8 | <0.00001* |
| Cluster 1               | Cluster 9 | <0.00001* |
| Cluster 2               | Cluster 3 | 0.03190*  |
| Cluster 2               | Cluster 4 | <0.00001* |
| Cluster 2               | Cluster 5 | <0.00001* |
| Cluster 2               | Cluster 6 | <0.00001* |
| Cluster 2               | Cluster 7 | 0.03920*  |
| Cluster 2               | Cluster 8 | <0.00001* |
| Cluster 2               | Cluster 9 | <0.00001* |
| Cluster 3               | Cluster 4 | <0.00001* |
| Cluster 3               | Cluster 5 | <0.00001* |
| Cluster 3               | Cluster 6 | <0.00001* |
| Cluster 3               | Cluster 7 | 0.89626   |
| Cluster 3               | Cluster 8 | <0.00001* |
| Cluster 3               | Cluster 9 | <0.00001* |
| Cluster 4               | Cluster 5 | <0.00001* |
| Cluster 4               | Cluster 6 | <0.00001* |
| Cluster 4               | Cluster 7 | <0.00001* |
| Cluster 4               | Cluster 8 | <0.00001* |
| Cluster 4               | Cluster 9 | <0.00001* |
| Cluster 5               | Cluster 6 | <0.00001* |
| Cluster 5               | Cluster 7 | <0.00001* |
| Cluster 5               | Cluster 8 | <0.00001* |
| Cluster 5               | Cluster 9 | <0.00001* |
| Cluster 6               | Cluster 7 | <0.00001* |
| Cluster 6               | Cluster 8 | <0.00001* |
| Cluster 6               | Cluster 9 | <0.00001* |
| Cluster 7               | Cluster 8 | <0.00001* |
| Cluster 7               | Cluster 9 | <0.00001* |
| Cluster 8               | Cluster 9 | 0.00449*  |

\*Reflects significance after adjusting for the false discovery rate at the  $p < .05$  level

Supplementary Table S5. Hypothesis Tests Comparing Spasticity PRO Responses Across Clusters

| Cluster Test Comparison |           | P-Value   |
|-------------------------|-----------|-----------|
| Cluster 1               | Cluster 2 | <0.00001* |
| Cluster 1               | Cluster 3 | <0.00001* |
| Cluster 1               | Cluster 4 | <0.00001* |
| Cluster 1               | Cluster 5 | <0.00001* |
| Cluster 1               | Cluster 6 | <0.00001* |
| Cluster 1               | Cluster 7 | <0.00001* |
| Cluster 1               | Cluster 8 | <0.00001* |
| Cluster 1               | Cluster 9 | <0.00001* |
| Cluster 2               | Cluster 3 | <0.00001* |
| Cluster 2               | Cluster 4 | <0.00001* |
| Cluster 2               | Cluster 5 | <0.00001* |
| Cluster 2               | Cluster 6 | <0.00001* |
| Cluster 2               | Cluster 7 | <0.00001* |
| Cluster 2               | Cluster 8 | <0.00001* |
| Cluster 2               | Cluster 9 | <0.00001* |
| Cluster 3               | Cluster 4 | <0.00001* |
| Cluster 3               | Cluster 5 | <0.00001* |
| Cluster 3               | Cluster 6 | <0.00001* |
| Cluster 3               | Cluster 7 | 0.07907   |
| Cluster 3               | Cluster 8 | <0.00001* |
| Cluster 3               | Cluster 9 | <0.00001* |
| Cluster 4               | Cluster 5 | <0.00001* |
| Cluster 4               | Cluster 6 | <0.00001* |
| Cluster 4               | Cluster 7 | 0.00334*  |
| Cluster 4               | Cluster 8 | <0.00001* |
| Cluster 4               | Cluster 9 | <0.00001* |
| Cluster 5               | Cluster 6 | <0.00001* |
| Cluster 5               | Cluster 7 | <0.00001* |
| Cluster 5               | Cluster 8 | <0.00001* |
| Cluster 5               | Cluster 9 | 0.07560   |
| Cluster 6               | Cluster 7 | <0.00001* |
| Cluster 6               | Cluster 8 | 0.00012*  |
| Cluster 6               | Cluster 9 | <0.00001* |
| Cluster 7               | Cluster 8 | <0.00001* |
| Cluster 7               | Cluster 9 | <0.00001* |
| Cluster 8               | Cluster 9 | <0.00001* |

\*Reflects significance after adjusting for the false discovery rate at the  $p < .05$  level

Supplementary Table S6. Hypothesis Tests Comparing Bladder/Bowel PRO Responses Across Clusters

| Cluster Test Comparison |           | P-Value   |
|-------------------------|-----------|-----------|
| Cluster 1               | Cluster 2 | <0.00001* |
| Cluster 1               | Cluster 3 | <0.00001* |
| Cluster 1               | Cluster 4 | <0.00001* |
| Cluster 1               | Cluster 5 | <0.00001* |
| Cluster 1               | Cluster 6 | <0.00001* |
| Cluster 1               | Cluster 7 | <0.00001* |
| Cluster 1               | Cluster 8 | <0.00001* |
| Cluster 1               | Cluster 9 | <0.00001* |
| Cluster 2               | Cluster 3 | 0.03780*  |
| Cluster 2               | Cluster 4 | <0.00001* |
| Cluster 2               | Cluster 5 | <0.00001* |
| Cluster 2               | Cluster 6 | <0.00001* |
| Cluster 2               | Cluster 7 | <0.00001* |
| Cluster 2               | Cluster 8 | <0.00001* |
| Cluster 2               | Cluster 9 | <0.00001* |
| Cluster 3               | Cluster 4 | <0.00001* |
| Cluster 3               | Cluster 5 | <0.00001* |
| Cluster 3               | Cluster 6 | <0.00001* |
| Cluster 3               | Cluster 7 | <0.00001* |
| Cluster 3               | Cluster 8 | <0.00001* |
| Cluster 3               | Cluster 9 | <0.00001* |
| Cluster 4               | Cluster 5 | 0.11100   |
| Cluster 4               | Cluster 6 | <0.00001* |
| Cluster 4               | Cluster 7 | 0.06737   |
| Cluster 4               | Cluster 8 | <0.00001* |
| Cluster 4               | Cluster 9 | <0.00001* |
| Cluster 5               | Cluster 6 | <0.00001* |
| Cluster 5               | Cluster 7 | 0.78419   |
| Cluster 5               | Cluster 8 | <0.00001* |
| Cluster 5               | Cluster 9 | <0.00001* |
| Cluster 6               | Cluster 7 | <0.00001* |
| Cluster 6               | Cluster 8 | <0.00008* |
| Cluster 6               | Cluster 9 | 0.00403*  |
| Cluster 7               | Cluster 8 | <0.00001* |
| Cluster 7               | Cluster 9 | <0.00001* |
| Cluster 8               | Cluster 9 | 0.34144   |

\*Reflects significance after adjusting for the false discovery rate at the  $p < .05$  level

Supplementary Table S7. Hypothesis Tests Comparing Pain PRO Responses Across Clusters

| Cluster Test Comparison |           | P-Value   |
|-------------------------|-----------|-----------|
| Cluster 1               | Cluster 2 | <0.00001* |
| Cluster 1               | Cluster 3 | <0.00001* |
| Cluster 1               | Cluster 4 | <0.00001* |
| Cluster 1               | Cluster 5 | <0.00001* |
| Cluster 1               | Cluster 6 | <0.00001* |
| Cluster 1               | Cluster 7 | <0.00001* |
| Cluster 1               | Cluster 8 | <0.00001* |
| Cluster 1               | Cluster 9 | <0.00001* |
| Cluster 2               | Cluster 3 | <0.00001* |
| Cluster 2               | Cluster 4 | <0.00001* |
| Cluster 2               | Cluster 5 | <0.00001* |
| Cluster 2               | Cluster 6 | <0.00001* |
| Cluster 2               | Cluster 7 | <0.00001* |
| Cluster 2               | Cluster 8 | <0.00001* |
| Cluster 2               | Cluster 9 | <0.00001* |
| Cluster 3               | Cluster 4 | <0.00001* |
| Cluster 3               | Cluster 5 | <0.00001* |
| Cluster 3               | Cluster 6 | <0.00001* |
| Cluster 3               | Cluster 7 | <0.00001* |
| Cluster 3               | Cluster 8 | <0.00001* |
| Cluster 3               | Cluster 9 | 0.71740   |
| Cluster 4               | Cluster 5 | <0.00001* |
| Cluster 4               | Cluster 6 | <0.00001* |
| Cluster 4               | Cluster 7 | <0.00001* |
| Cluster 4               | Cluster 8 | 0.59022   |
| Cluster 4               | Cluster 9 | <0.00001* |
| Cluster 5               | Cluster 6 | <0.00001* |
| Cluster 5               | Cluster 7 | <0.00001* |
| Cluster 5               | Cluster 8 | <0.00001* |
| Cluster 5               | Cluster 9 | <0.00001* |
| Cluster 6               | Cluster 7 | <0.00001* |
| Cluster 6               | Cluster 8 | <0.00001* |
| Cluster 6               | Cluster 9 | <0.00001* |
| Cluster 7               | Cluster 8 | <0.00001* |
| Cluster 7               | Cluster 9 | <0.00001* |
| Cluster 8               | Cluster 9 | <0.00001* |

\*Reflects significance after adjusting for the false discovery rate at the  $p < .05$  level



Supplementary Table S8. Hypothesis Tests Comparing Sensory Symptom PRO Responses Across Clusters

| Cluster Test Comparison |           | P-Value   |
|-------------------------|-----------|-----------|
| Cluster 1               | Cluster 2 | <0.00001* |
| Cluster 1               | Cluster 3 | <0.00001* |
| Cluster 1               | Cluster 4 | <0.00001* |
| Cluster 1               | Cluster 5 | <0.00001* |
| Cluster 1               | Cluster 6 | <0.00001* |
| Cluster 1               | Cluster 7 | 0.00430*  |
| Cluster 1               | Cluster 8 | <0.00001* |
| Cluster 1               | Cluster 9 | <0.00001* |
| Cluster 2               | Cluster 3 | <0.00001* |
| Cluster 2               | Cluster 4 | <0.00001* |
| Cluster 2               | Cluster 5 | <0.00001* |
| Cluster 2               | Cluster 6 | <0.00001* |
| Cluster 2               | Cluster 7 | <0.00001* |
| Cluster 2               | Cluster 8 | <0.00001* |
| Cluster 2               | Cluster 9 | 0.89037   |
| Cluster 3               | Cluster 4 | <0.00001* |
| Cluster 3               | Cluster 5 | 0.09310   |
| Cluster 3               | Cluster 6 | <0.00001* |
| Cluster 3               | Cluster 7 | <0.00001* |
| Cluster 3               | Cluster 8 | 0.75915   |
| Cluster 3               | Cluster 9 | <0.00001* |
| Cluster 4               | Cluster 5 | <0.00001* |
| Cluster 4               | Cluster 6 | <0.00001* |
| Cluster 4               | Cluster 7 | <0.00001* |
| Cluster 4               | Cluster 8 | <0.00001* |
| Cluster 4               | Cluster 9 | <0.00001* |
| Cluster 5               | Cluster 6 | <0.00001* |
| Cluster 5               | Cluster 7 | <0.00001* |
| Cluster 5               | Cluster 8 | 0.10740   |
| Cluster 5               | Cluster 9 | <0.00001* |
| Cluster 6               | Cluster 7 | <0.00001* |
| Cluster 6               | Cluster 8 | <0.00001* |
| Cluster 6               | Cluster 9 | <0.00001* |
| Cluster 7               | Cluster 8 | <0.00001* |
| Cluster 7               | Cluster 9 | 0.00041*  |
| Cluster 8               | Cluster 9 | <0.00001* |

\*Reflects significance after adjusting for the false discovery rate at the  $p < .05$  level

Supplementary Table S9. Hypothesis Tests Comparing Vision PRO Responses Across Clusters

| Cluster Test Comparison |           | P-Value   |
|-------------------------|-----------|-----------|
| Cluster 1               | Cluster 2 | <0.00001* |
| Cluster 1               | Cluster 3 | 0.00179*  |
| Cluster 1               | Cluster 4 | <0.00001* |
| Cluster 1               | Cluster 5 | <0.00001* |
| Cluster 1               | Cluster 6 | <0.00001* |
| Cluster 1               | Cluster 7 | 0.71330   |
| Cluster 1               | Cluster 8 | <0.00001* |
| Cluster 1               | Cluster 9 | <0.00001* |
| Cluster 2               | Cluster 3 | <0.00001* |
| Cluster 2               | Cluster 4 | <0.00001* |
| Cluster 2               | Cluster 5 | <0.00001* |
| Cluster 2               | Cluster 6 | <0.00001* |
| Cluster 2               | Cluster 7 | <0.00001* |
| Cluster 2               | Cluster 8 | 0.25276   |
| Cluster 2               | Cluster 9 | <0.00001* |
| Cluster 3               | Cluster 4 | <0.00001* |
| Cluster 3               | Cluster 5 | <0.00001* |
| Cluster 3               | Cluster 6 | <0.00001* |
| Cluster 3               | Cluster 7 | 0.03114*  |
| Cluster 3               | Cluster 8 | 0.00103*  |
| Cluster 3               | Cluster 9 | <0.00001* |
| Cluster 4               | Cluster 5 | 0.00003*  |
| Cluster 4               | Cluster 6 | <0.00001* |
| Cluster 4               | Cluster 7 | <0.00001* |
| Cluster 4               | Cluster 8 | <0.00001* |
| Cluster 4               | Cluster 9 | 0.77461   |
| Cluster 5               | Cluster 6 | <0.00001* |
| Cluster 5               | Cluster 7 | <0.00001* |
| Cluster 5               | Cluster 8 | <0.00001* |
| Cluster 5               | Cluster 9 | 0.00579*  |
| Cluster 6               | Cluster 7 | <0.00001* |
| Cluster 6               | Cluster 8 | <0.00001* |
| Cluster 6               | Cluster 9 | <0.00001* |
| Cluster 7               | Cluster 8 | <0.00001* |
| Cluster 7               | Cluster 9 | <0.00001* |
| Cluster 8               | Cluster 9 | <0.00001* |

\*Reflects significance after adjusting for the false discovery rate at the  $p < .05$  level

Supplementary Table S10. Hypothesis Tests Comparing Fatigue PRO Responses Across Clusters

| Cluster Test Comparison |           | P-Value   |  |
|-------------------------|-----------|-----------|--|
| Cluster 1               | Cluster 2 | <0.00001* |  |
| Cluster 1               | Cluster 3 | <0.00001* |  |
| Cluster 1               | Cluster 4 | <0.00001* |  |
| Cluster 1               | Cluster 5 | <0.00001* |  |
| Cluster 1               | Cluster 6 | <0.00001* |  |
| Cluster 1               | Cluster 7 | <0.00001* |  |
| Cluster 1               | Cluster 8 | <0.00001* |  |
| Cluster 1               | Cluster 9 | <0.00001* |  |
| Cluster 2               | Cluster 3 | <0.00001* |  |
| Cluster 2               | Cluster 4 | <0.00001* |  |
| Cluster 2               | Cluster 5 | <0.00001* |  |
| Cluster 2               | Cluster 6 | <0.00001* |  |
| Cluster 2               | Cluster 7 | <0.00001* |  |
| Cluster 2               | Cluster 8 | <0.00001* |  |
| Cluster 2               | Cluster 9 | <0.00001* |  |
| Cluster 3               | Cluster 4 | <0.00001* |  |
| Cluster 3               | Cluster 5 | <0.00001* |  |
| Cluster 3               | Cluster 6 | <0.00001* |  |
| Cluster 3               | Cluster 7 | <0.00001* |  |
| Cluster 3               | Cluster 8 | <0.00001* |  |
| Cluster 3               | Cluster 9 | <0.00001* |  |
| Cluster 4               | Cluster 5 | 0.00003*  |  |
| Cluster 4               | Cluster 6 | <0.00001* |  |
| Cluster 4               | Cluster 7 | <0.00001* |  |
| Cluster 4               | Cluster 8 | 0.00083*  |  |
| Cluster 4               | Cluster 9 | 0.43254   |  |
| Cluster 5               | Cluster 6 | <0.00001* |  |
| Cluster 5               | Cluster 7 | <0.00001* |  |
| Cluster 5               | Cluster 8 | <0.00001* |  |
| Cluster 5               | Cluster 9 | 0.00005*  |  |
| Cluster 6               | Cluster 7 | <0.00001* |  |
| Cluster 6               | Cluster 8 | <0.00001* |  |
| Cluster 6               | Cluster 9 | <0.00001* |  |
| Cluster 7               | Cluster 8 | <0.00001* |  |
| Cluster 7               | Cluster 9 | <0.00001* |  |
| Cluster 8               | Cluster 9 | 0.05184   |  |

\*Reflects significance after adjusting for the false discovery rate at the  $p < .05$  level

Supplementary Table S11. Hypothesis Tests Comparing Cognitive Symptom PRO Responses Across Clusters

| Cluster Test Comparison |           | P-Value   |
|-------------------------|-----------|-----------|
| Cluster 1               | Cluster 2 | <0.00001* |
| Cluster 1               | Cluster 3 | <0.00001* |
| Cluster 1               | Cluster 4 | <0.00001* |
| Cluster 1               | Cluster 5 | <0.00001* |
| Cluster 1               | Cluster 6 | <0.00001* |
| Cluster 1               | Cluster 7 | 0.14993   |
| Cluster 1               | Cluster 8 | <0.00001* |
| Cluster 1               | Cluster 9 | <0.00001* |
| Cluster 2               | Cluster 3 | <0.00001* |
| Cluster 2               | Cluster 4 | <0.00001* |
| Cluster 2               | Cluster 5 | <0.00001* |
| Cluster 2               | Cluster 6 | <0.00001* |
| Cluster 2               | Cluster 7 | <0.00001* |
| Cluster 2               | Cluster 8 | <0.00001* |
| Cluster 2               | Cluster 9 | <0.00001* |
| Cluster 3               | Cluster 4 | <0.00001* |
| Cluster 3               | Cluster 5 | <0.00001* |
| Cluster 3               | Cluster 6 | <0.00001* |
| Cluster 3               | Cluster 7 | <0.00001* |
| Cluster 3               | Cluster 8 | 0.58263   |
| Cluster 3               | Cluster 9 | <0.00001* |
| Cluster 4               | Cluster 5 | <0.00001* |
| Cluster 4               | Cluster 6 | <0.00001* |
| Cluster 4               | Cluster 7 | <0.00001* |
| Cluster 4               | Cluster 8 | <0.00001* |
| Cluster 4               | Cluster 9 | 0.02664*  |
| Cluster 5               | Cluster 6 | <0.00001* |
| Cluster 5               | Cluster 7 | <0.00001* |
| Cluster 5               | Cluster 8 | <0.00001* |
| Cluster 5               | Cluster 9 | <0.00001* |
| Cluster 6               | Cluster 7 | <0.00001* |
| Cluster 6               | Cluster 8 | <0.00001* |
| Cluster 6               | Cluster 9 | <0.00001* |
| Cluster 7               | Cluster 8 | <0.00001* |
| Cluster 7               | Cluster 9 | <0.00001* |
| Cluster 8               | Cluster 9 | <0.00001* |

\*Reflects significance after adjusting for the false discovery rate at the  $p < .05$  level

Supplementary Table S12. Hypothesis Tests Comparing Depression PRO Responses Across Clusters

| Cluster Test Comparison |           | P-Value   |
|-------------------------|-----------|-----------|
| Cluster 1               | Cluster 2 | <0.00001* |
| Cluster 1               | Cluster 3 | <0.00001* |
| Cluster 1               | Cluster 4 | <0.00001* |
| Cluster 1               | Cluster 5 | <0.00001* |
| Cluster 1               | Cluster 6 | <0.00001* |
| Cluster 1               | Cluster 7 | <0.00001* |
| Cluster 1               | Cluster 8 | <0.00001* |
| Cluster 1               | Cluster 9 | <0.00001* |
| Cluster 2               | Cluster 3 | <0.00001* |
| Cluster 2               | Cluster 4 | <0.00001* |
| Cluster 2               | Cluster 5 | <0.00001* |
| Cluster 2               | Cluster 6 | <0.00001* |
| Cluster 2               | Cluster 7 | <0.00001* |
| Cluster 2               | Cluster 8 | 0.62133   |
| Cluster 2               | Cluster 9 | <0.00001* |
| Cluster 3               | Cluster 4 | <0.00001* |
| Cluster 3               | Cluster 5 | <0.00001* |
| Cluster 3               | Cluster 6 | <0.00001* |
| Cluster 3               | Cluster 7 | 0.00006*  |
| Cluster 3               | Cluster 8 | 0.00026*  |
| Cluster 3               | Cluster 9 | <0.00001* |
| Cluster 4               | Cluster 5 | 0.01151*  |
| Cluster 4               | Cluster 6 | <0.00001* |
| Cluster 4               | Cluster 7 | <0.00001* |
| Cluster 4               | Cluster 8 | <0.00001* |
| Cluster 4               | Cluster 9 | 0.81458   |
| Cluster 5               | Cluster 6 | <0.00001* |
| Cluster 5               | Cluster 7 | <0.00001* |
| Cluster 5               | Cluster 8 | <0.00001* |
| Cluster 5               | Cluster 9 | 0.05998   |
| Cluster 6               | Cluster 7 | <0.00001* |
| Cluster 6               | Cluster 8 | <0.00001* |
| Cluster 6               | Cluster 9 | <0.00001* |
| Cluster 7               | Cluster 8 | <0.00001* |
| Cluster 7               | Cluster 9 | <0.00001* |
| Cluster 8               | Cluster 9 | <0.00001* |

\*Reflects significance after adjusting for the false discovery rate at the  $p < .05$  level

Supplementary Table S13. Comparison of Covariates Associated with Cluster Membership Based on Models Estimate With and Without Propensity Score Weights.

| Attribute Outcome               | Low Mobility Impairment      |      |                        |      |                            |      |                            |      | Moderate Mobility Impairment  |      | High Mobility Impairment    |      |                             |      |                               |      |                             |      |  |
|---------------------------------|------------------------------|------|------------------------|------|----------------------------|------|----------------------------|------|-------------------------------|------|-----------------------------|------|-----------------------------|------|-------------------------------|------|-----------------------------|------|--|
|                                 | Cluster 1 Normal Functioning |      | Cluster 2 Mild Fatigue |      | Cluster 3 Sensory Symptoms |      | Cluster 4 Somatic Symptoms |      | Cluster 5 Somatic & Cognitive |      | Cluster 6 Severe Disability |      | Cluster 7 Mobility-Specific |      | Cluster 8 Moderate Disability |      | Cluster 9 Physical Symptoms |      |  |
|                                 | UW                           | PW   | UW                     | PW   | UW                         | PW   | UW                         | PW   | UW                            | PW   | UW                          | PW   | UW                          | PW   | UW                            | PW   | UW                          | PW   |  |
| <b>Symptoms and Functioning</b> |                              |      |                        |      |                            |      |                            |      |                               |      |                             |      |                             |      |                               |      |                             |      |  |
| Timed 25-Ft Walk                | 5.05                         | 5.05 | 5.54                   | 5.18 | 6.43                       | 6.93 | 7.03                       | 7.03 | 7.85                          | 7.69 | 11.9                        | 11.5 | 18.2                        | 16.9 | 15.8                          | 16.3 | 13.8                        | 11.4 |  |
| 9-Hole Peg Test                 | 20.9                         | 22.6 | 23.9                   | 24.2 | 22.6                       | 23.3 | 24.7                       | 24.8 | 27.3                          | 27.2 | 37.2                        | 35.3 | 31.1                        | 31.8 | 42.2                          | 37.3 | 35.8                        | 31.2 |  |
| EQ5D                            | 0.88                         | 0.87 | 0.76                   | 0.77 | 0.69                       | 0.69 | 0.64                       | 0.64 | 0.54                          | 0.55 | 0.34                        | 0.33 | 0.70                        | 0.70 | 0.50                          | 0.51 | 0.53                        | 0.54 |  |
| PHQ-9                           | 2.41                         | 2.29 | 7.52                   | 6.96 | 7.49                       | 7.11 | 12.5                       | 12.4 | 15.1                          | 14.9 | 19.3                        | 19.5 | 3.58                        | 4.27 | 9.28                          | 10.5 | 11.9                        | 12.9 |  |
| <b>Health Conditions</b>        |                              |      |                        |      |                            |      |                            |      |                               |      |                             |      |                             |      |                               |      |                             |      |  |
| Hypertension                    | 7.50                         | 11.6 | 6.70                   | 7.20 | 8.80                       | 8.30 | 12.7                       | 12.3 | 10.0                          | 10.7 | 12.5                        | 13.5 | 16.4                        | 14.5 | 10.1                          | 4.30 | 6.90                        | 6.00 |  |
| Tobacco - Current               | 12.6                         | 11.5 | 19.9                   | 17.5 | 22.7                       | 22.4 | 26.4                       | 27.0 | 38.5                          | 38.5 | 37.3                        | 39.9 | 14.3                        | 22.3 | 18.3                          | 21.1 | 13.5                        | 23.7 |  |
| Tobacco - Former                | 26.6                         | 27.9 | 31.6                   | 34.2 | 30.9                       | 31.2 | 32.4                       | 32.0 | 28.4                          | 27.8 | 34.2                        | 34.1 | 39.4                        | 28.0 | 34.1                          | 38.4 | 46.7                        | 35.5 |  |
| Tobacco - Never                 | 60.8                         | 60.6 | 48.4                   | 48.3 | 46.4                       | 46.4 | 41.2                       | 41.0 | 33.2                          | 33.6 | 28.5                        | 26.1 | 46.3                        | 49.7 | 47.5                          | 40.5 | 39.8                        | 40.9 |  |

*Note:* For results that used propensity score weights, clusters were conditioned on years since symptom onset and MS type. The sample for this analysis (N=5,009) reflects participants who had data available on these conditioning variables. Percentages are reported for dichotomous variables (Health Conditions) and means are reported for continuous variables (Symptoms and Functioning). UW = Unweighted; PW = Propensity score weighted.

Supplementary Figure S1. Single Profile Plot of PROs for All Observed Patient Clusters

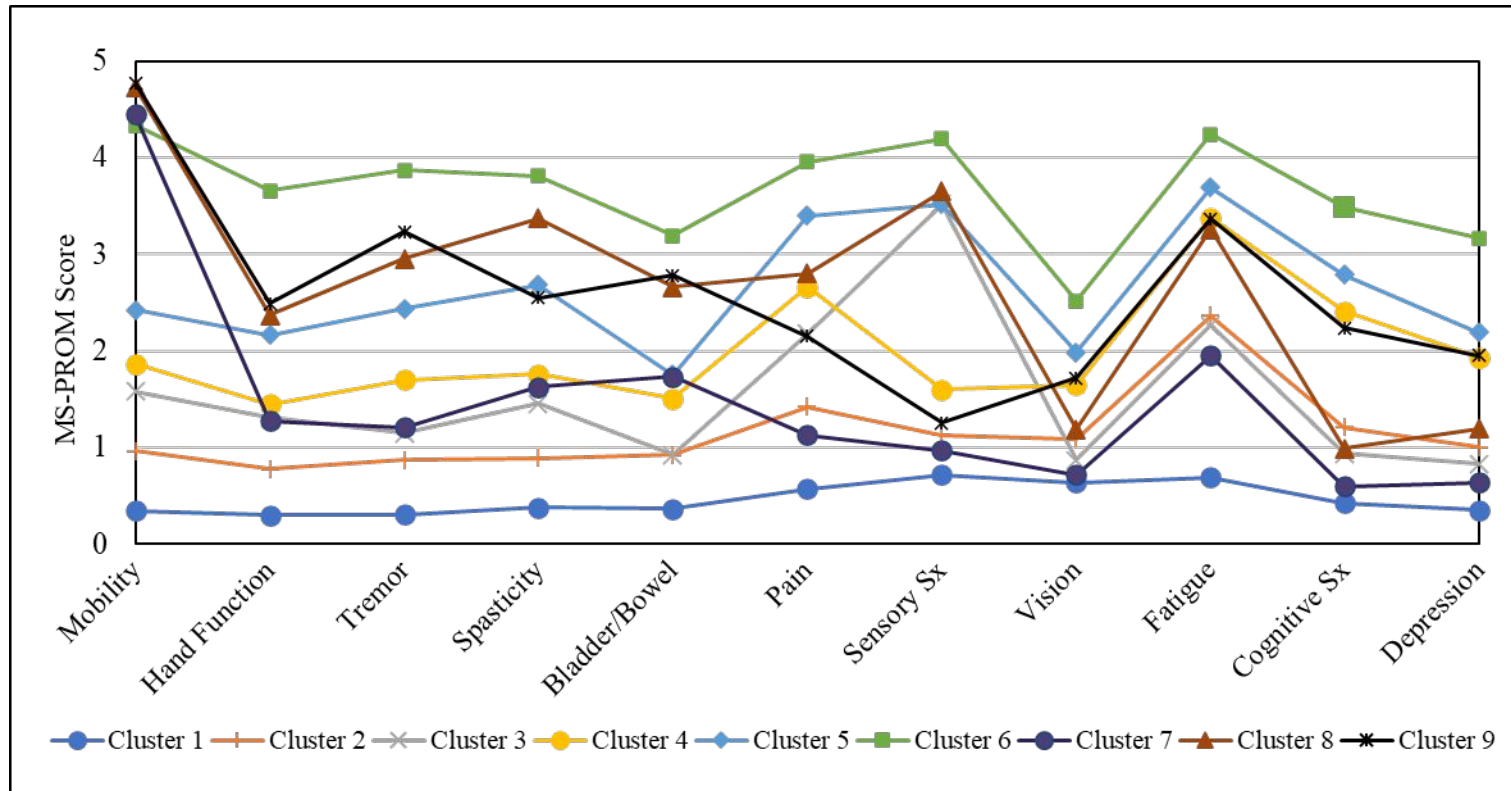

Supplementary Figure S2. Scatterplot of Mobility PRO Means by Cluster and Years Since MS Symptom Onset

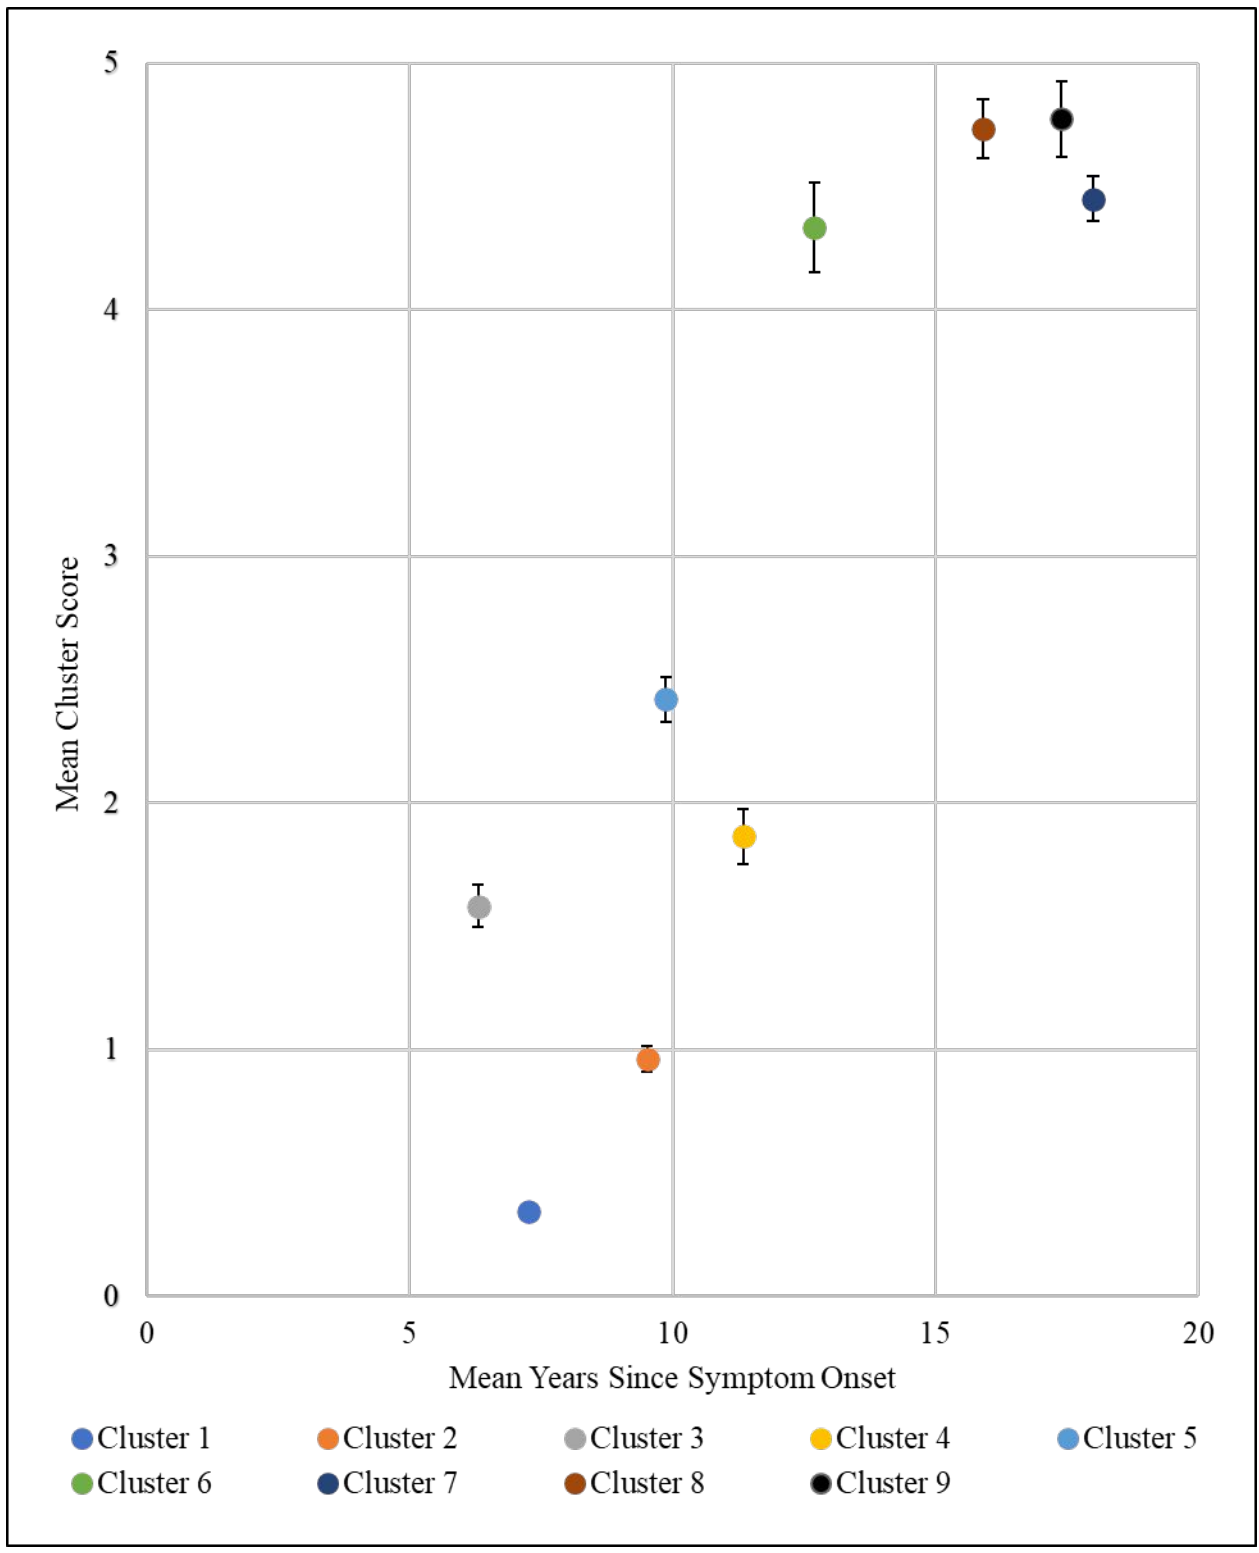



Supplementary Figure S3. Scatterplot of Hand Function PRO Means by Cluster and Years Since MS Symptom Onset

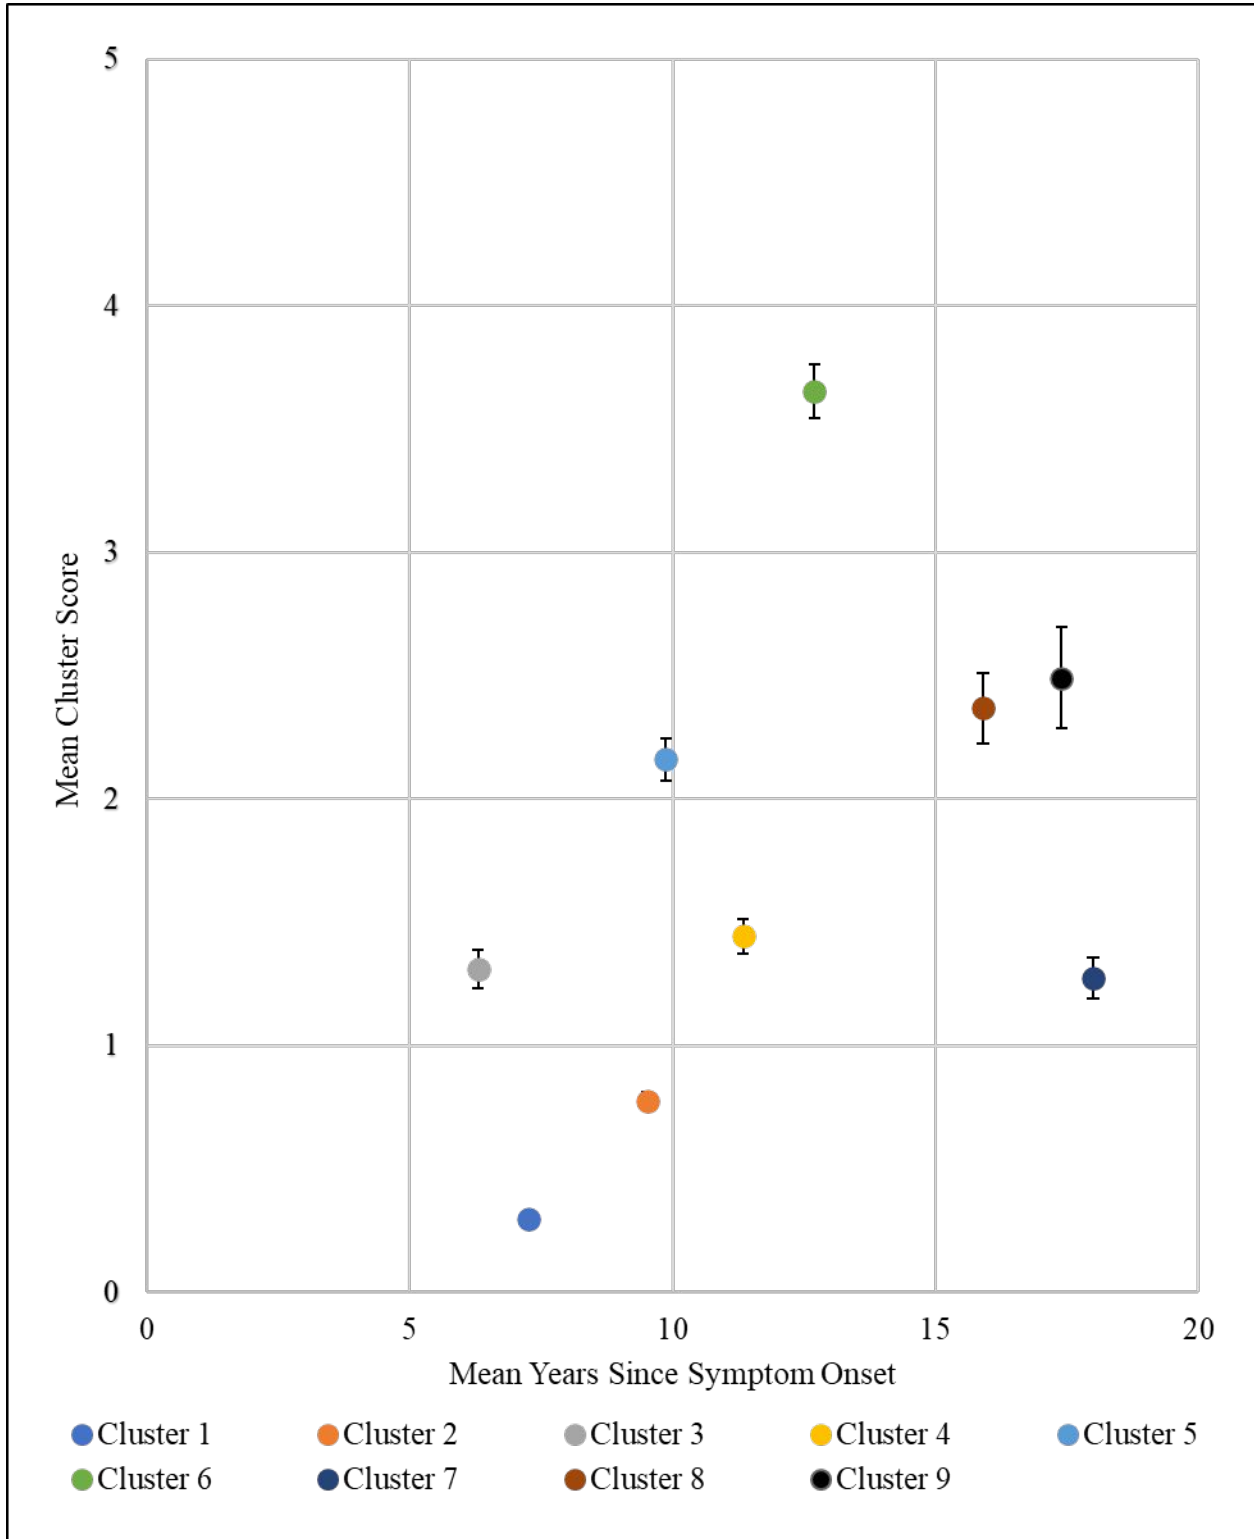

Supplementary Figure S4. Scatterplot of Tremor PRO Means by Cluster and Years Since MS Symptom Onset

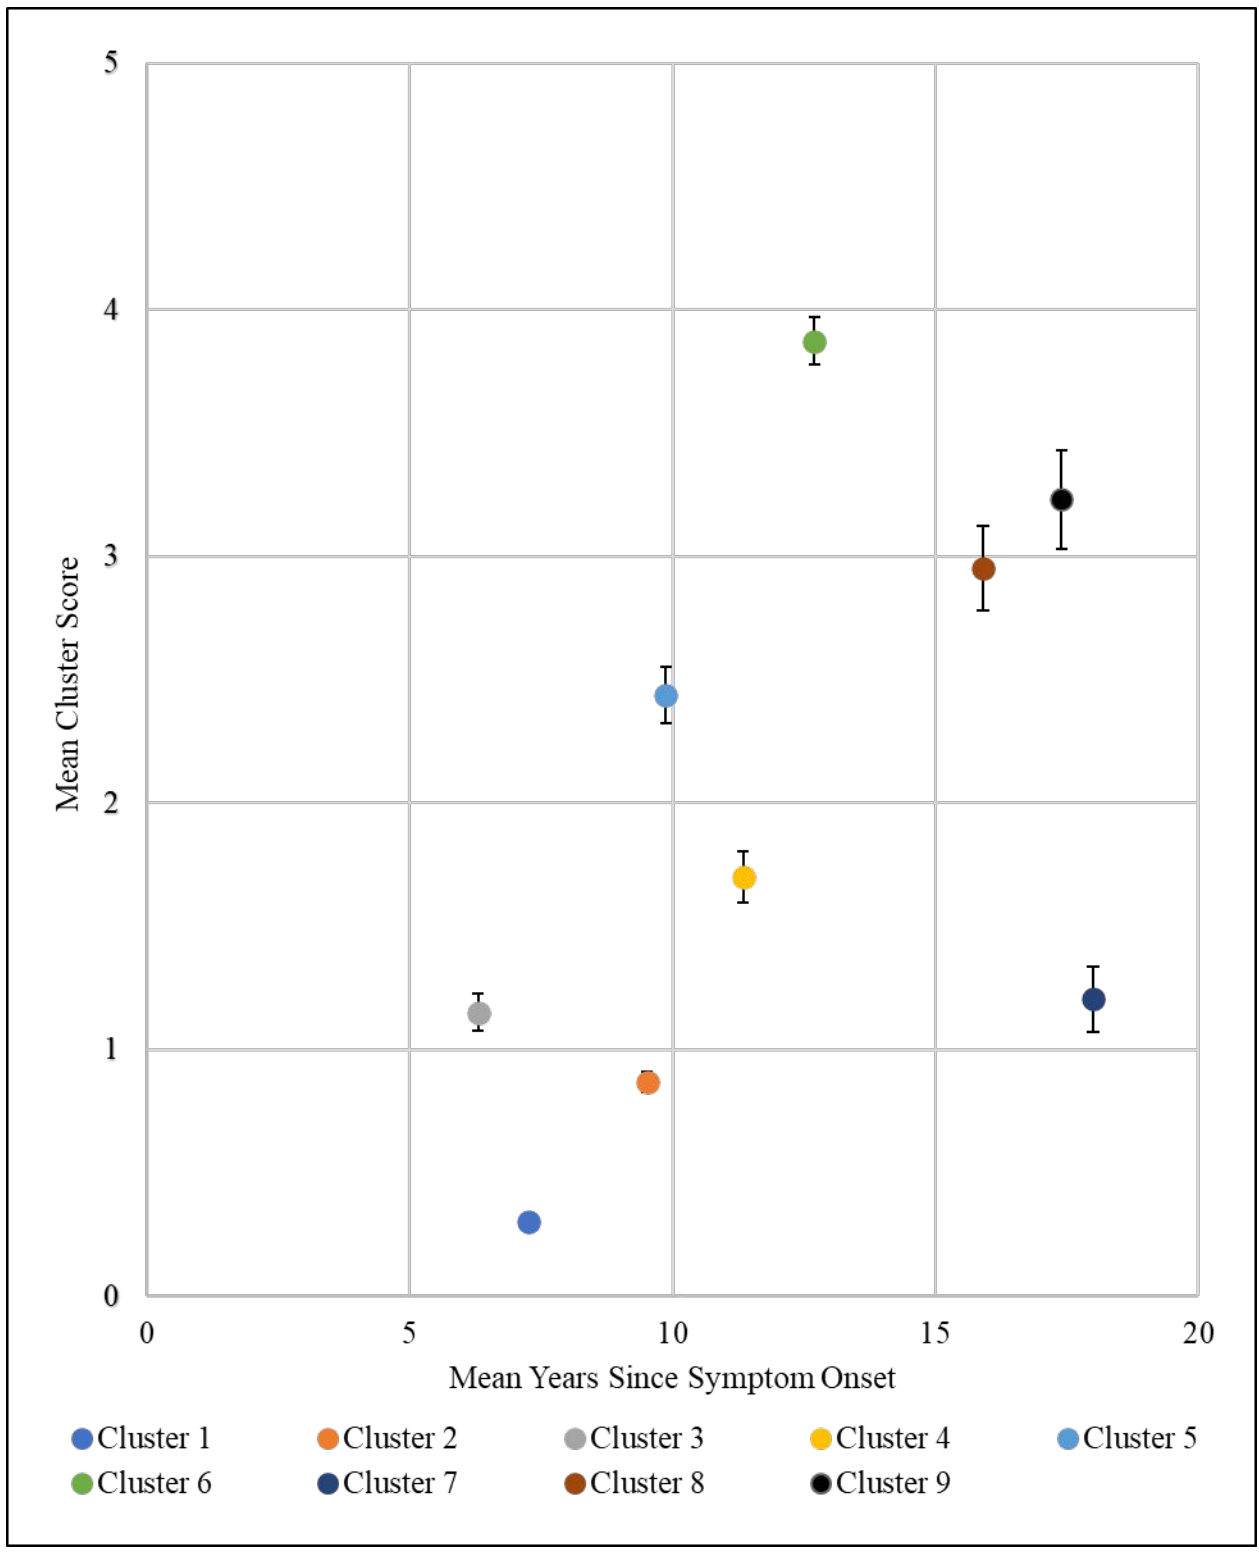

Supplementary Figure S5. Scatterplot of Spasticity PRO Means by Cluster and Years Since MS Symptom Onset

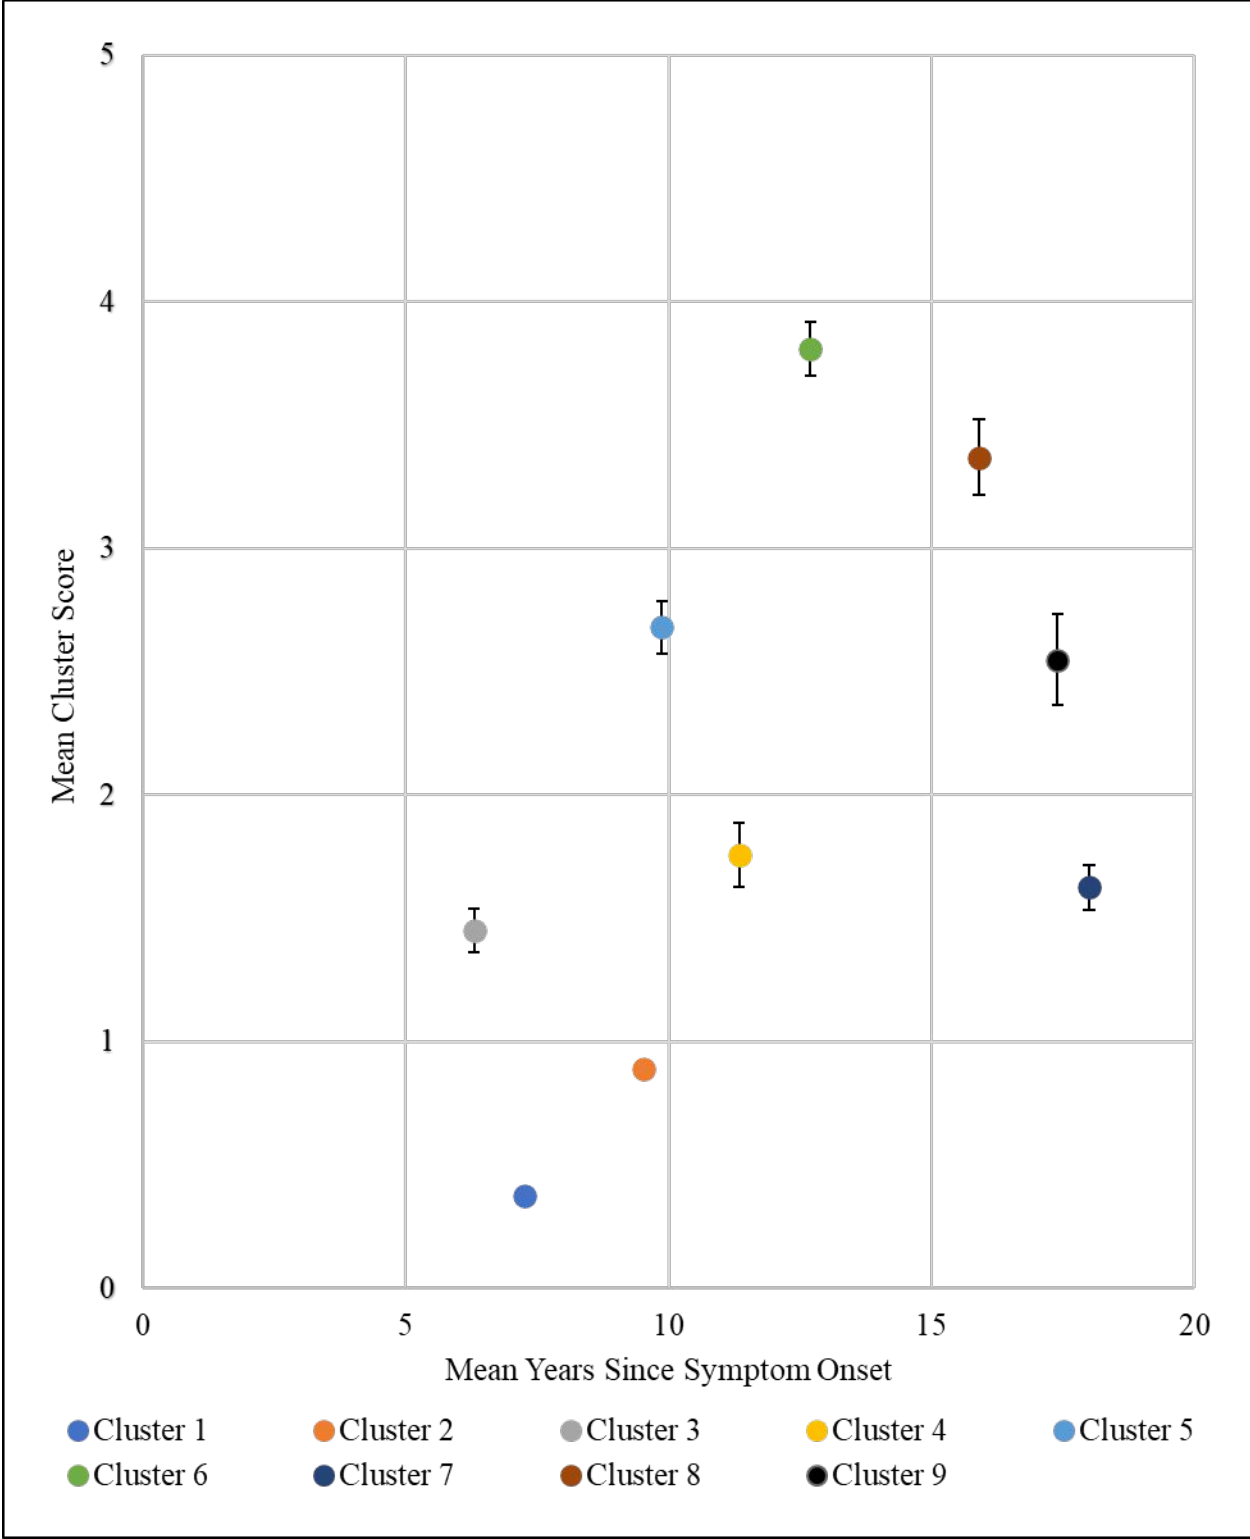

Supplementary Figure S6. Scatterplot of Bladder/Bowel PRO Means by Cluster and Years Since MS Symptom Onset

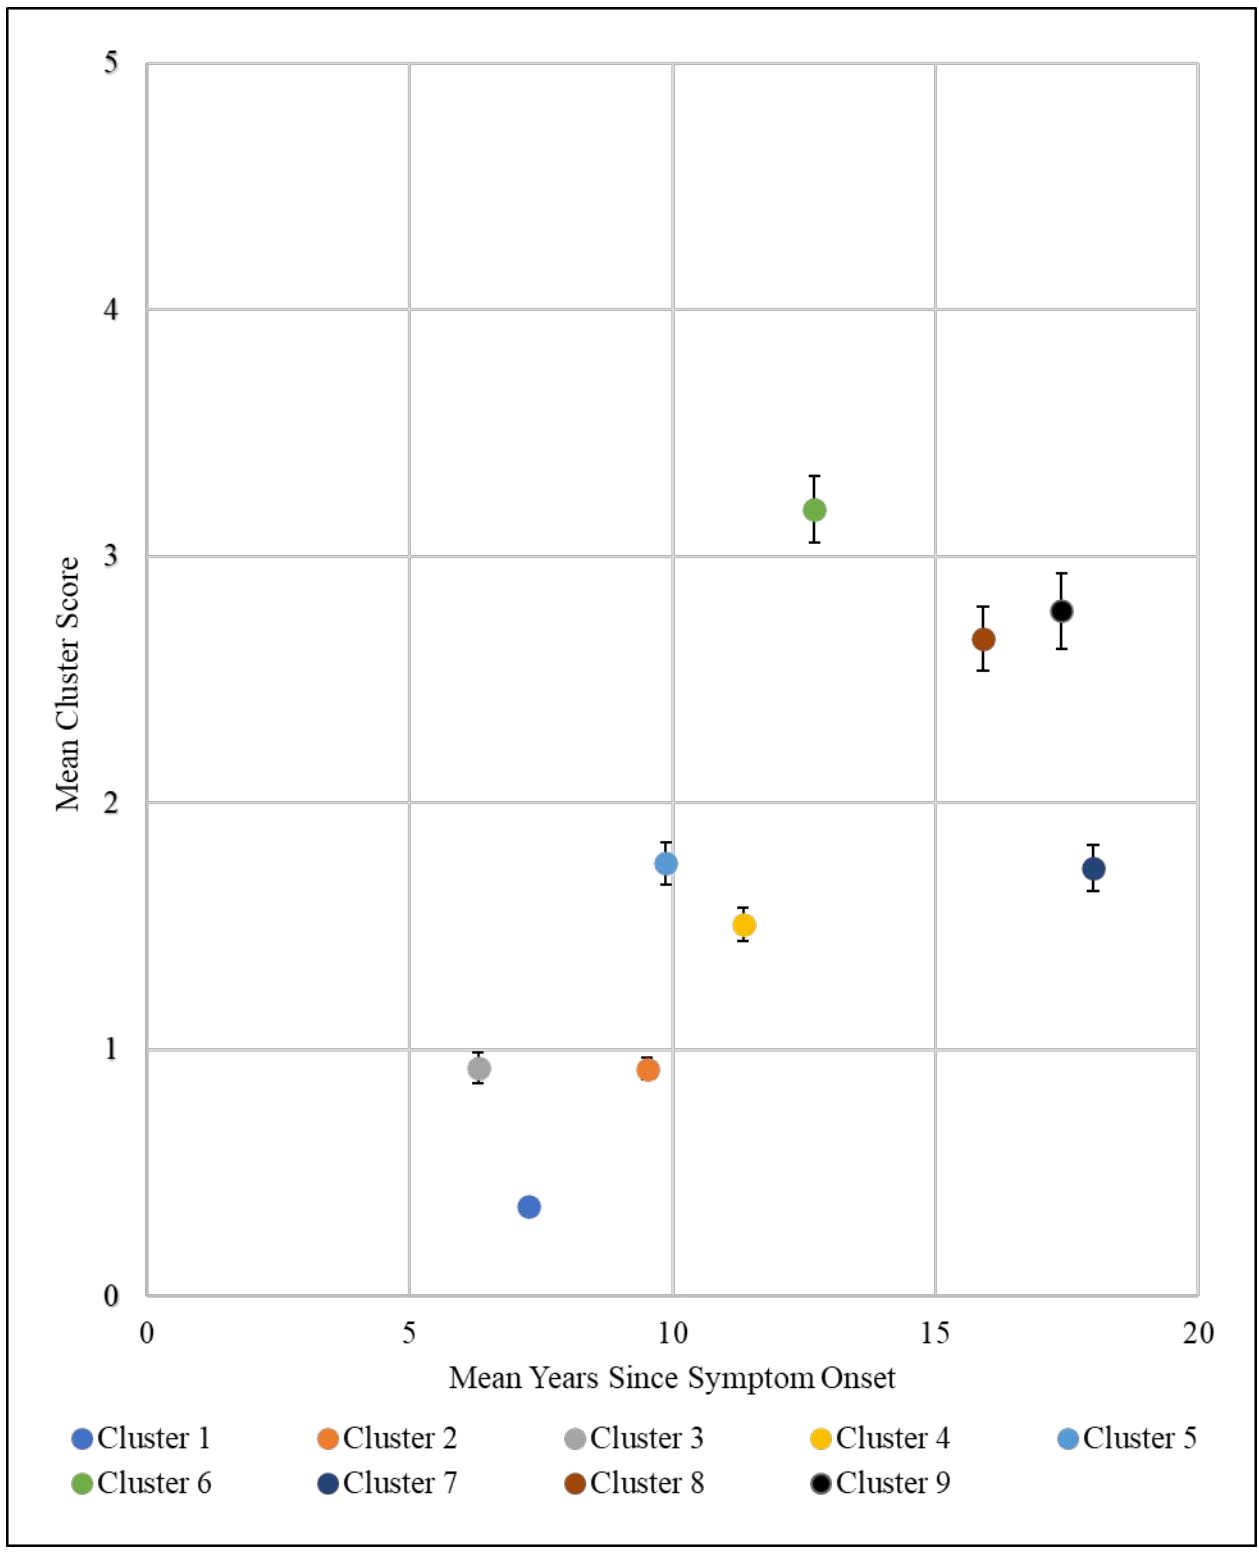

Supplementary Figure S7. Scatterplot of Pain PRO Means by Cluster and Years Since MS Symptom Onset

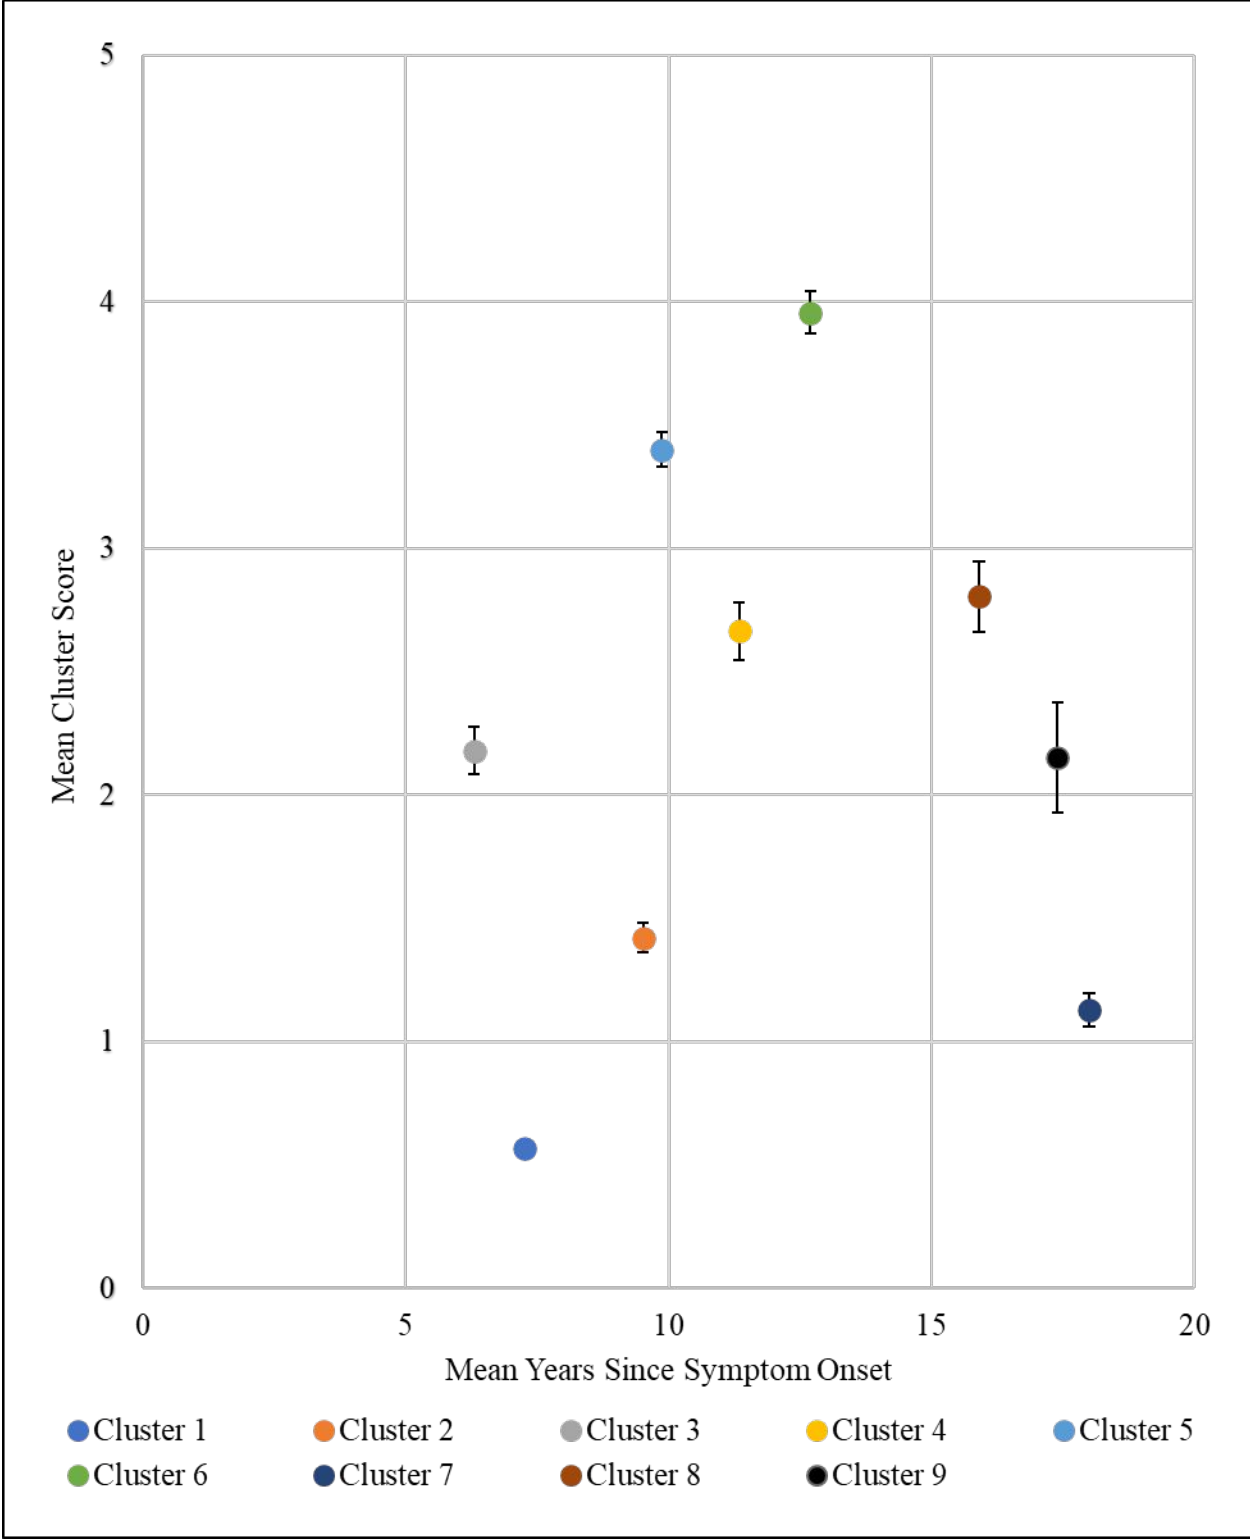

Supplementary Figure S8. Scatterplot of Sensory Symptom PRO Means by Cluster and Years Since MS Symptom Onset

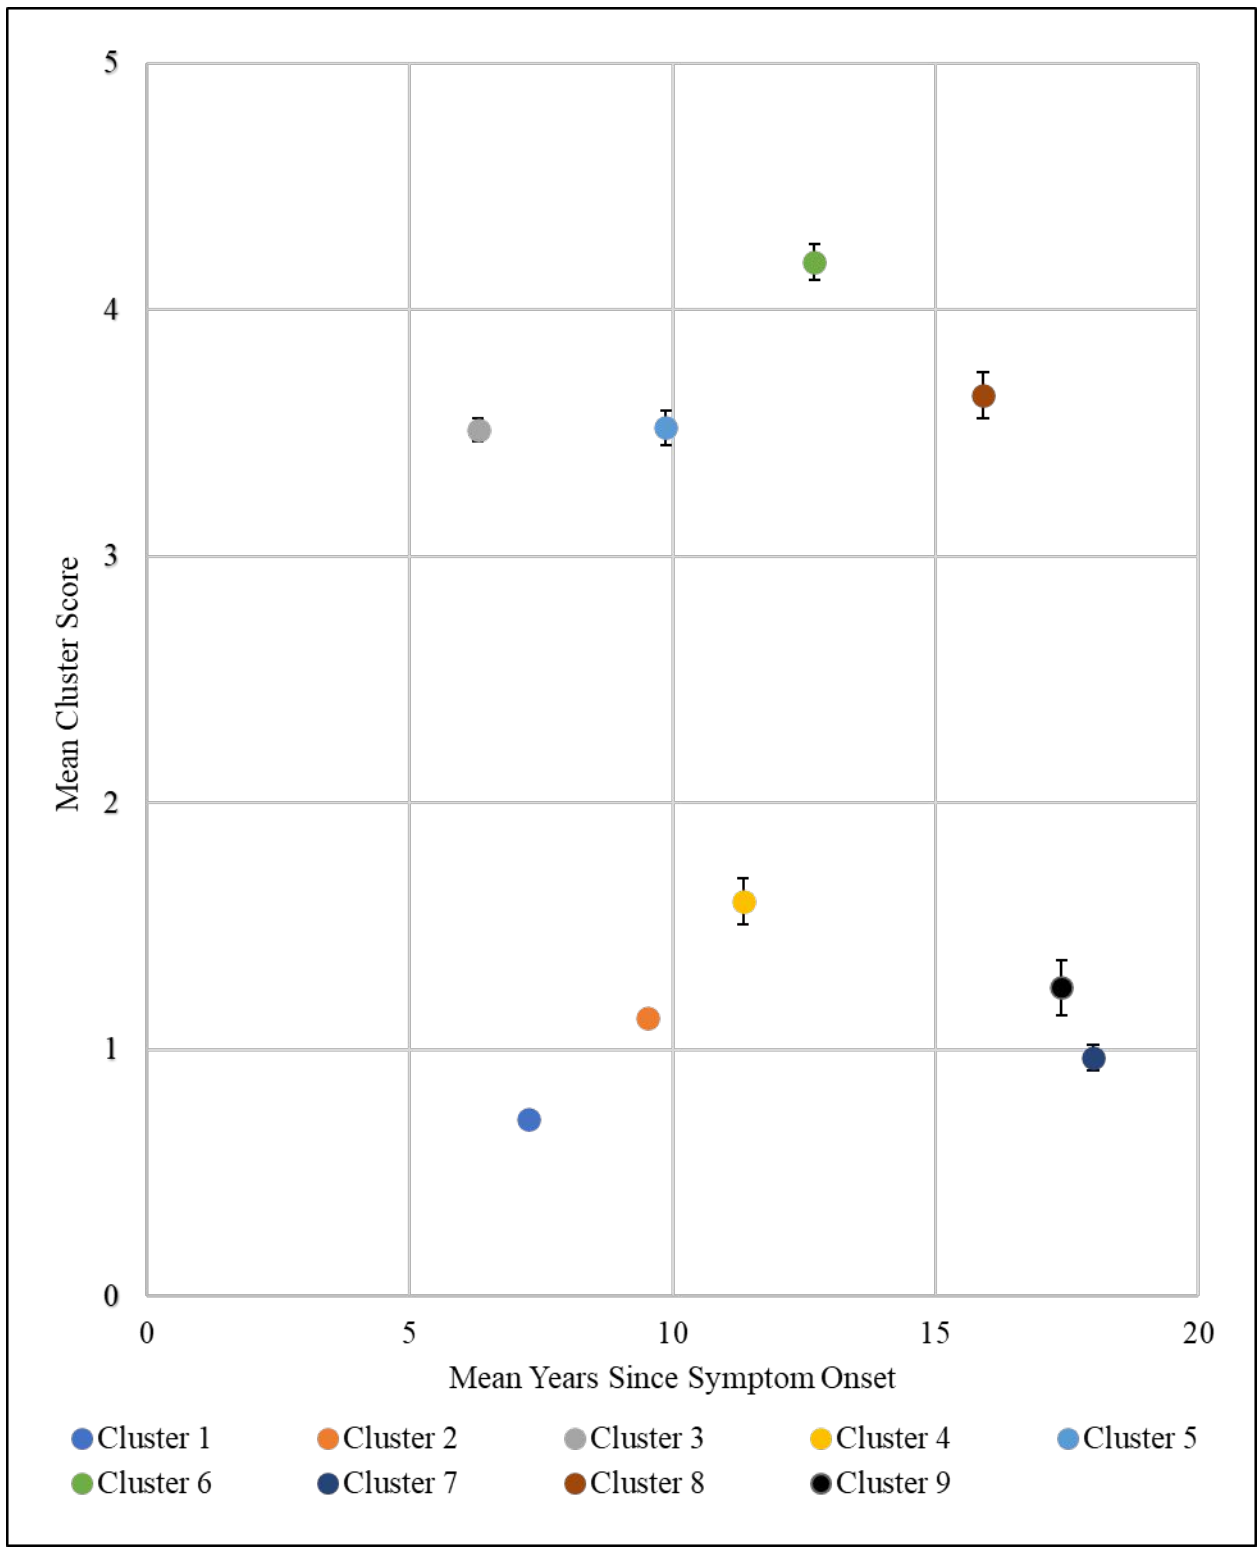

Supplementary Figure S9. Scatterplot of Vision PRO Means by Cluster and Years Since MS Symptom Onset

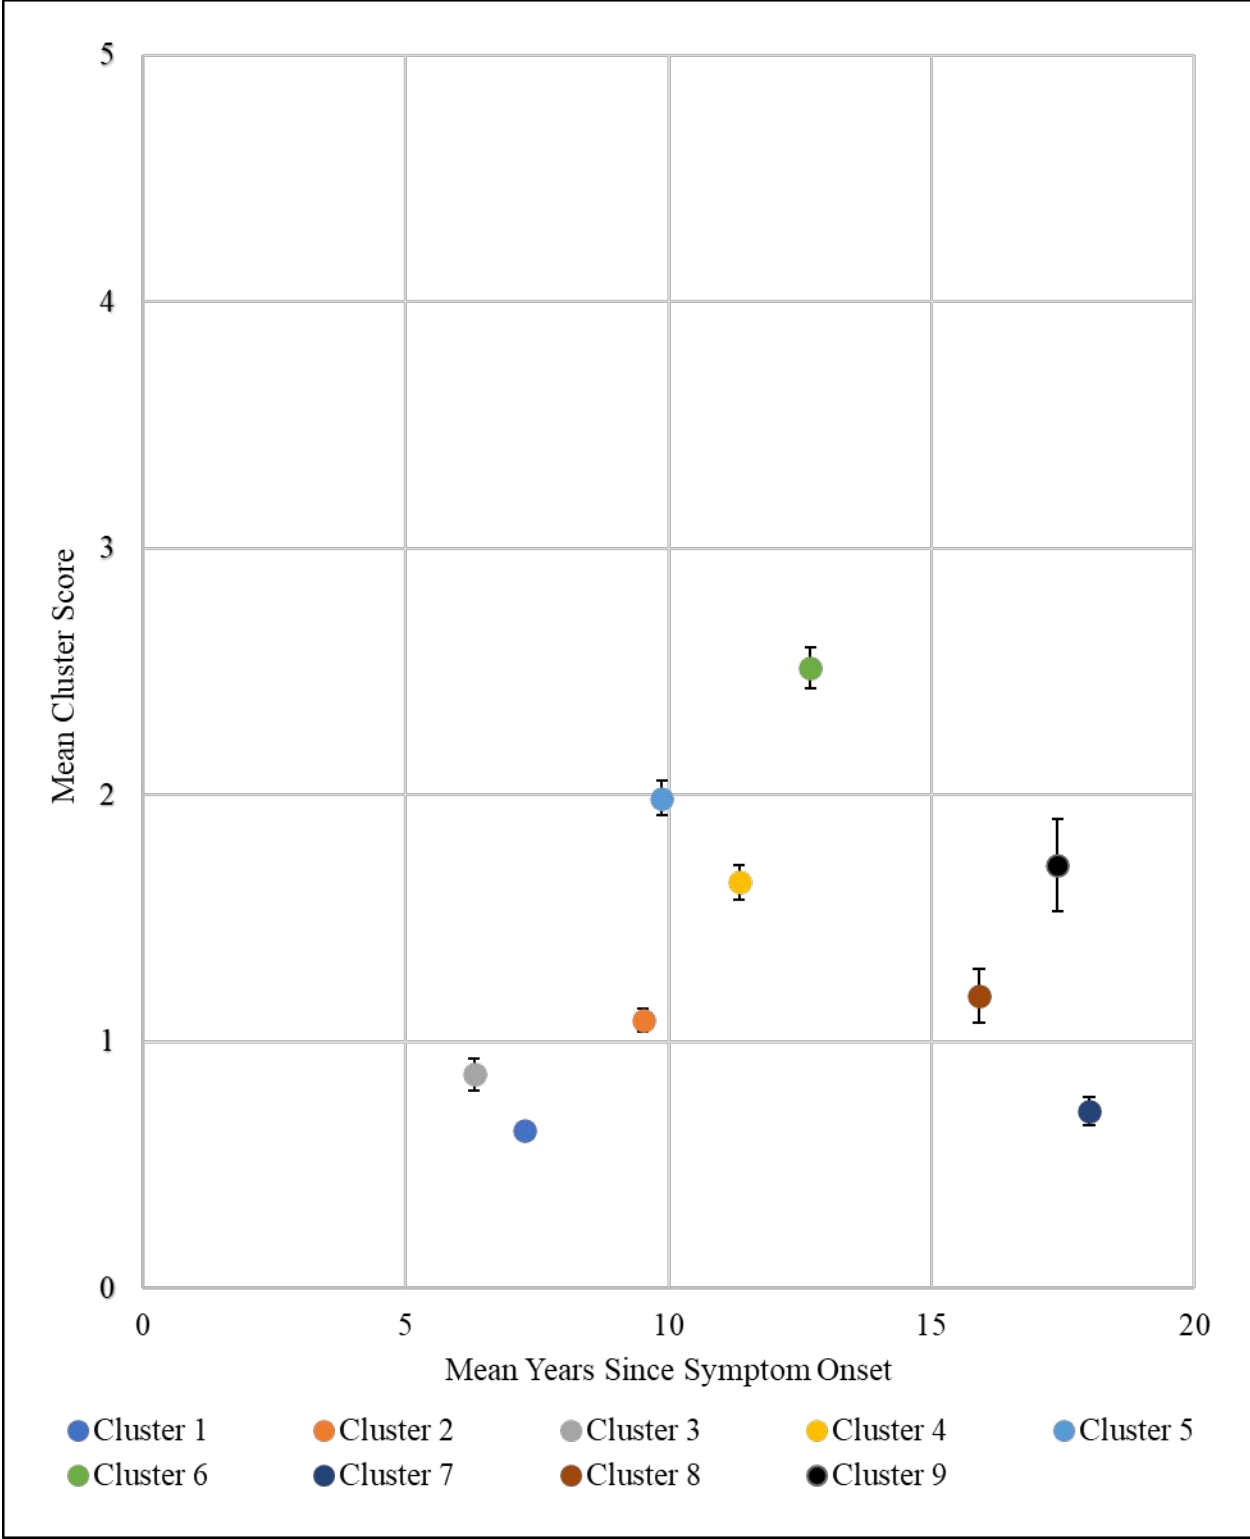

Supplementary Figure S10. Scatterplot of Fatigue PRO Means by Cluster and Years Since MS Symptom Onset

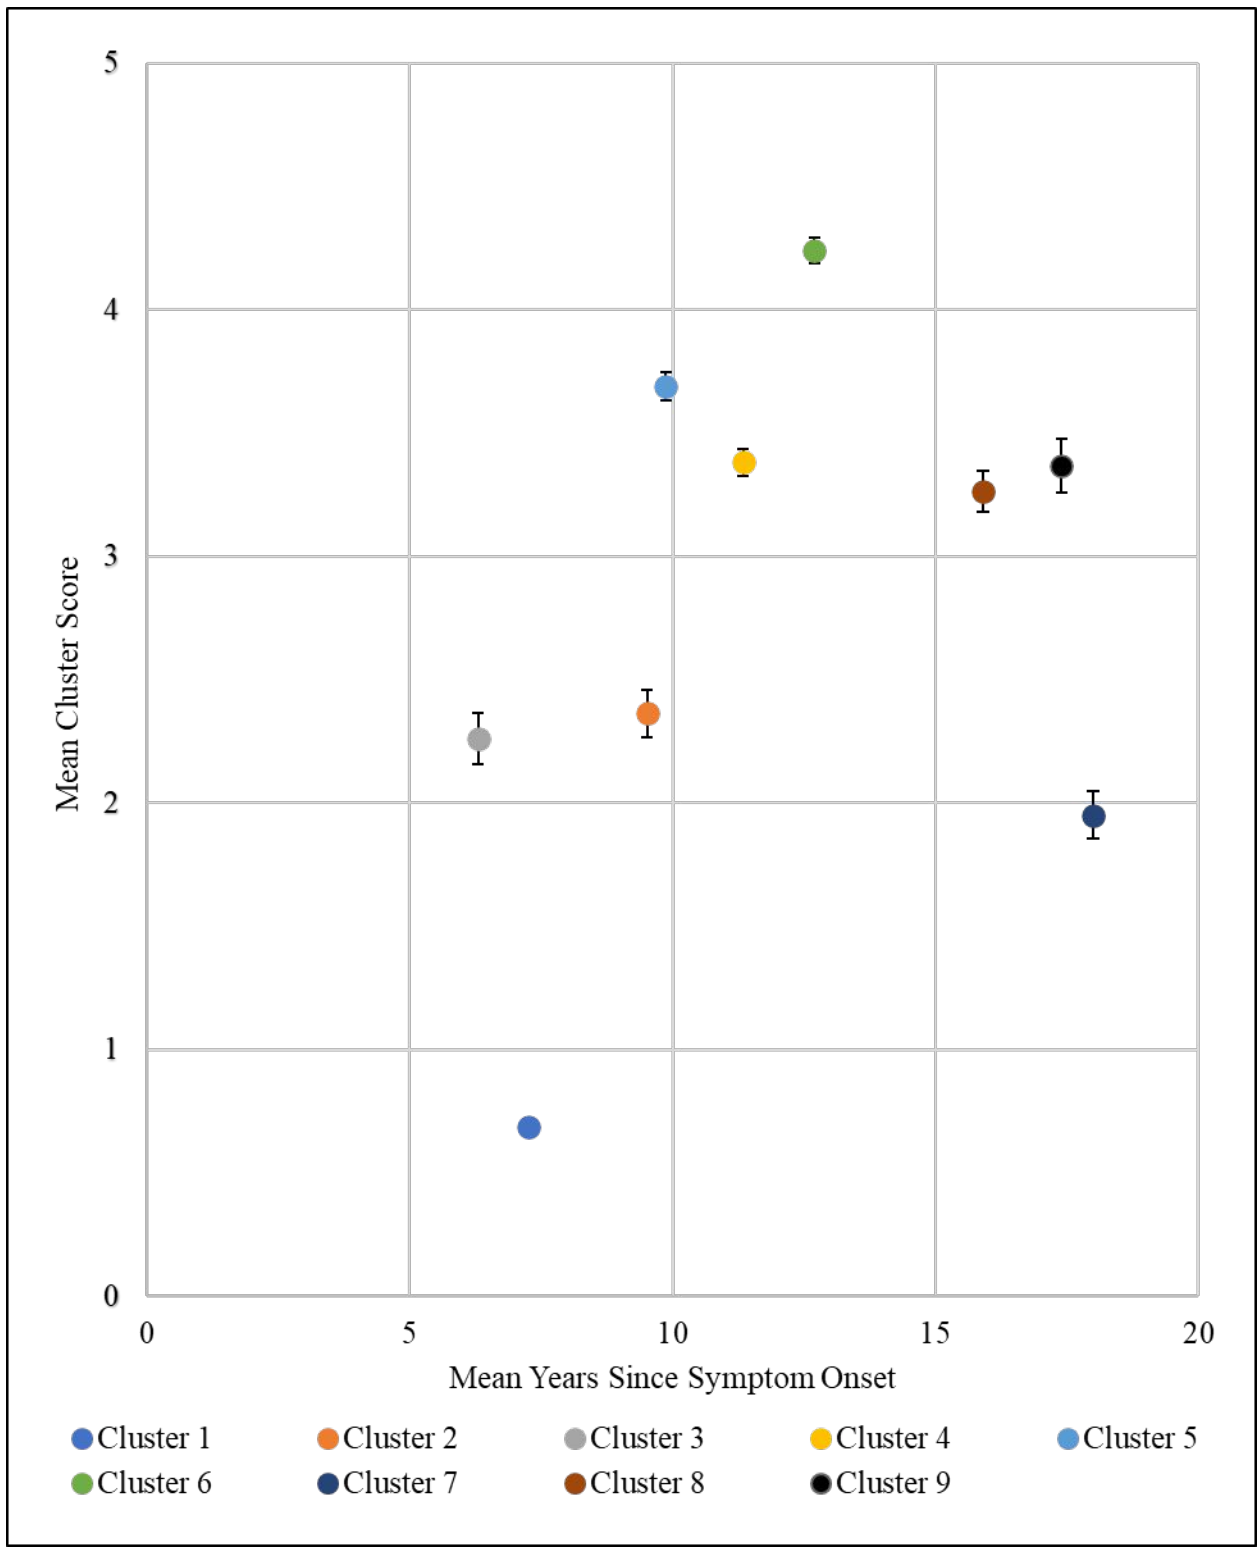



Supplementary Figure S11. Scatterplot of Cognitive Symptom PRO Means by Cluster and Years Since MS Symptom Onset

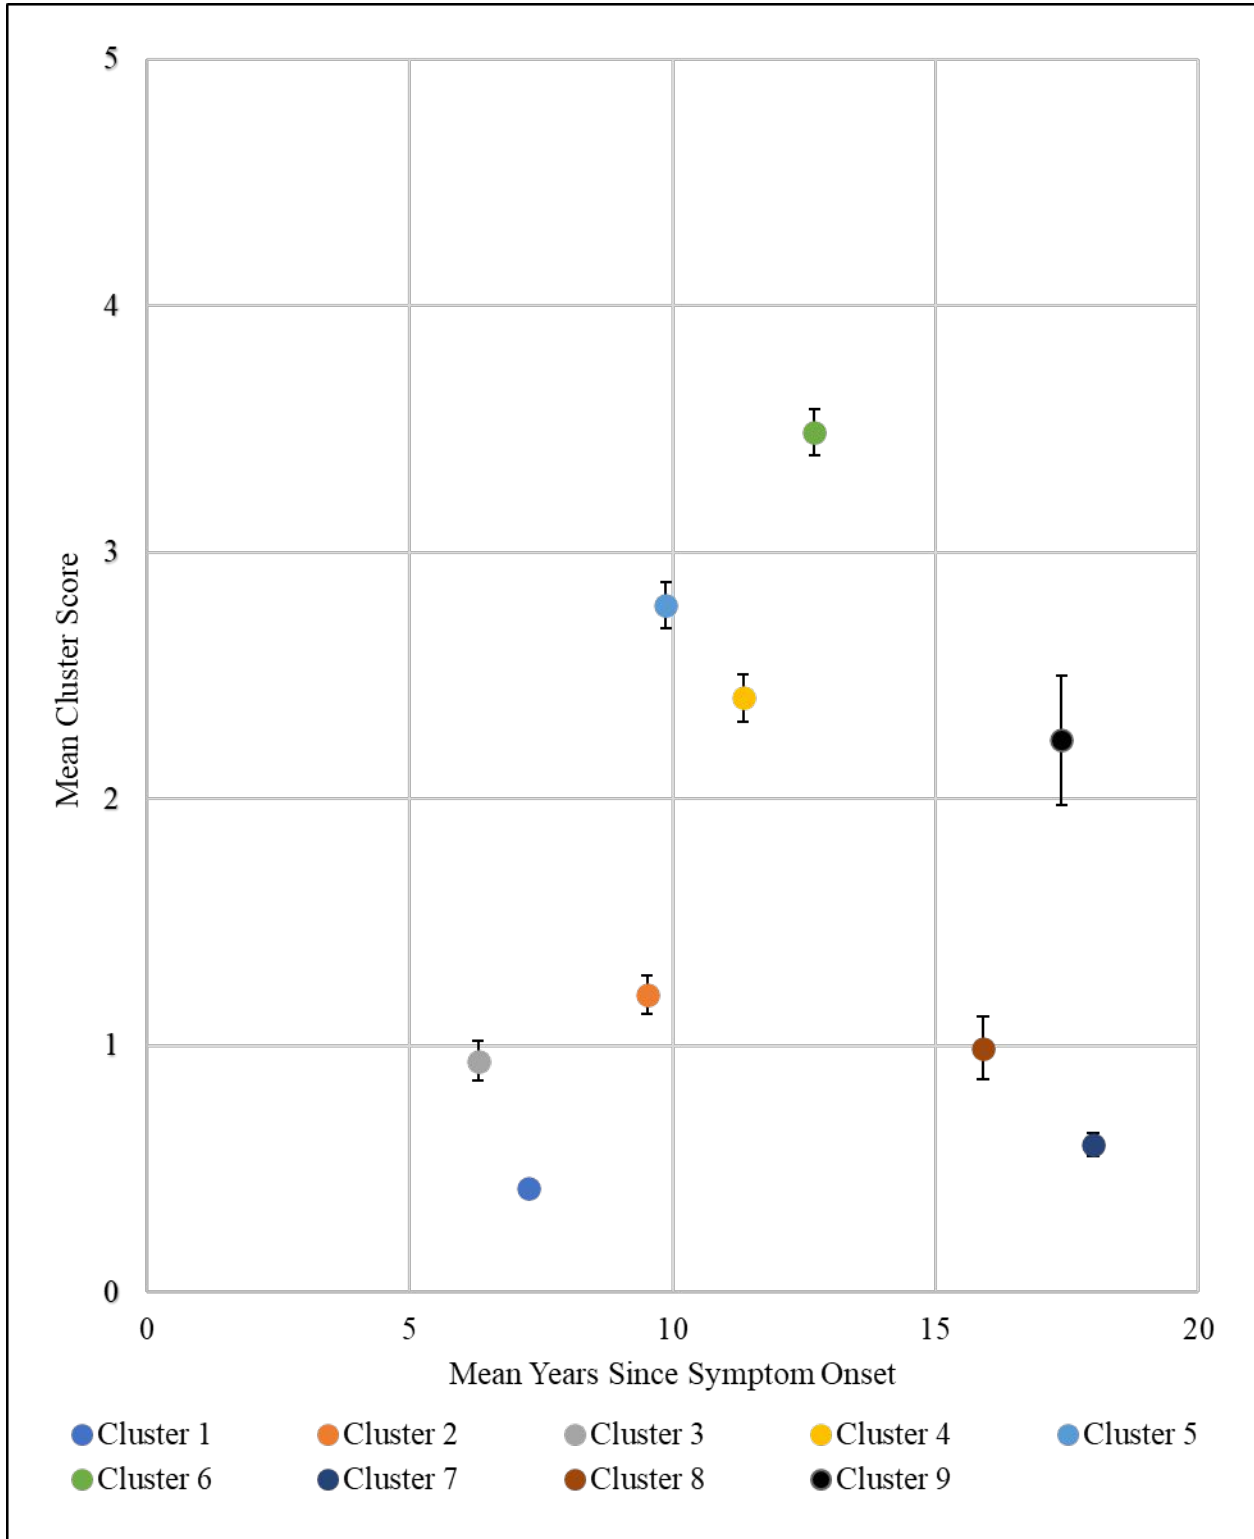

Supplementary Figure S12. Scatterplot of Depression PRO Means by Cluster and Years Since MS Symptom Onset

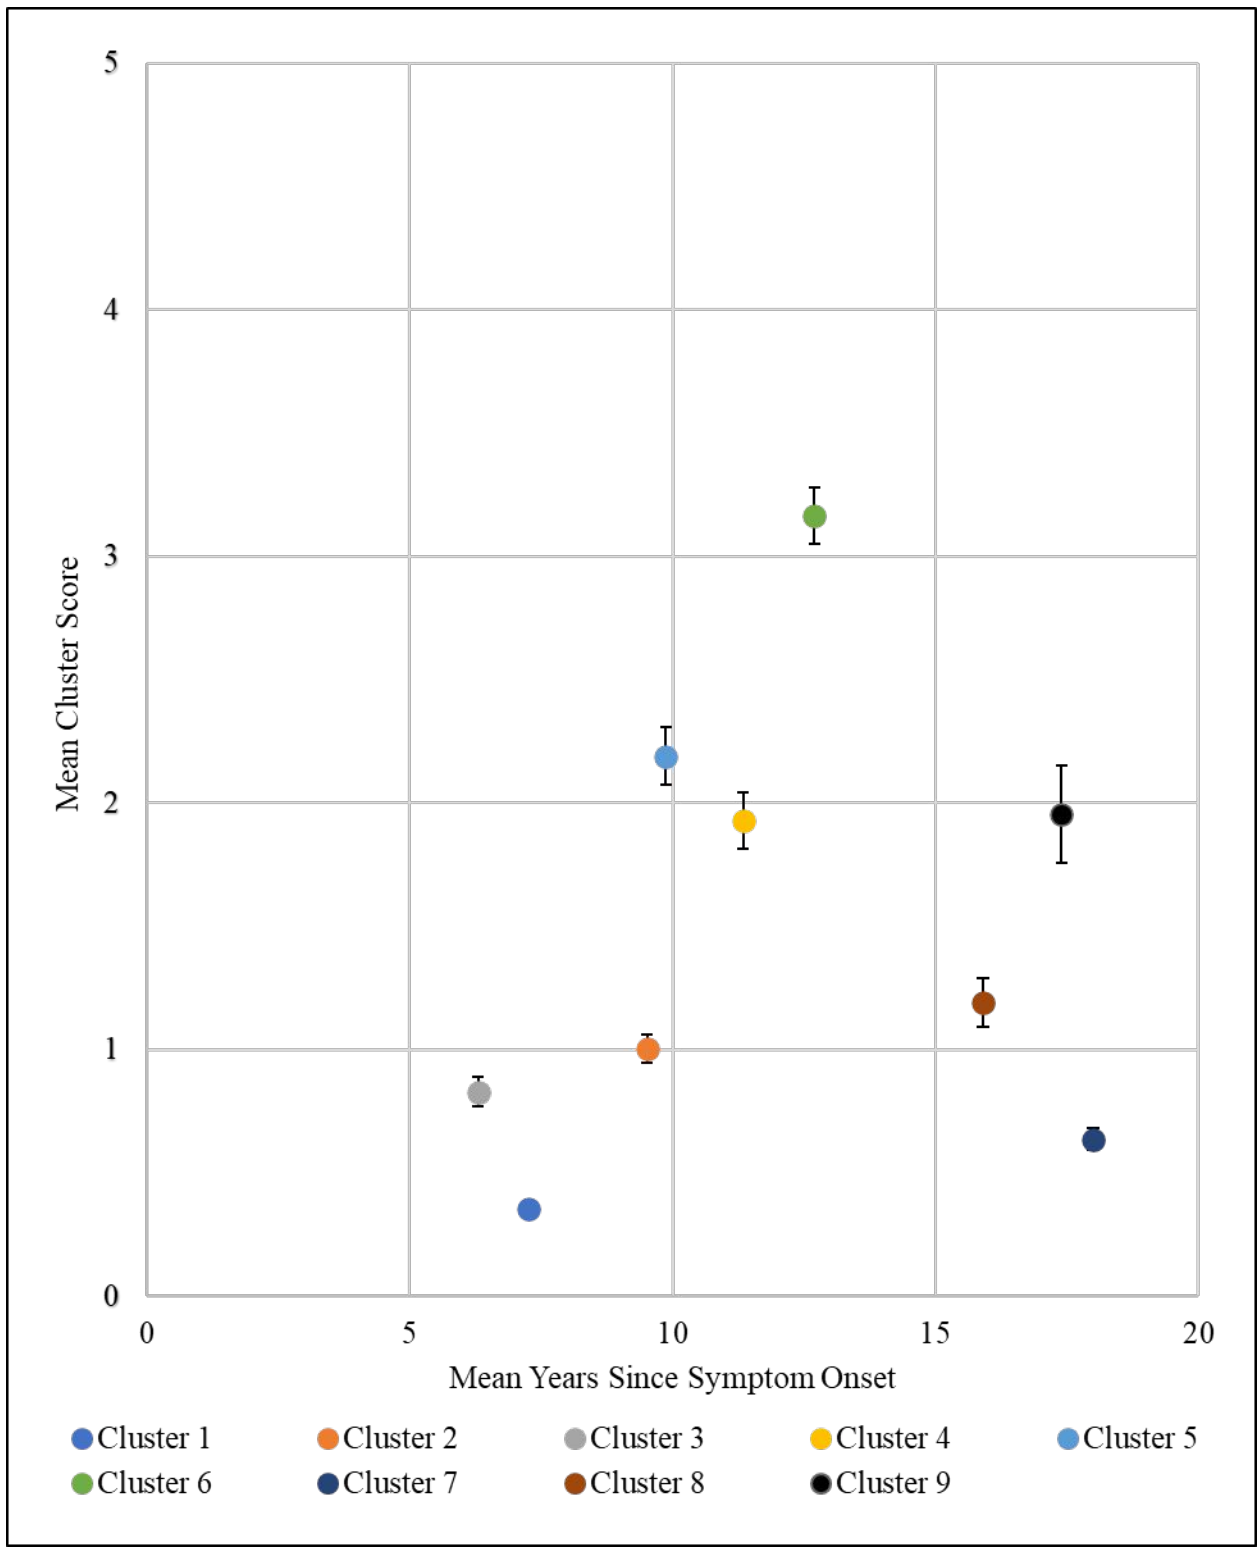

Supplement: NIHMS2019447-supplement-1.pdf [file NIHMS2019447-supplement-1.pdf]
